# Supplementary material
Source: Springer Nature journal article supplement (https://www.springermedizin.de/resource/supplementary/12891_2012_1559_MOESM2_ESM.pdf/9508502)
Supplement: MOESM2 [file 9508502]

# Enrollment

Triage to determine participant eligibility

Randomisation (n=86)

Allocation

Follow-Up  
6 weeks

Follow-Up  
6 months

Patients will be assigned to the  
Mat Group (n=43)

Pain, Disability, Kinesiophobia,  
Global Impression of Recovery and  
Patient-Specific Functional Status

Pain, Disability, Kinesiophobia,  
Global Impression of Recovery and  
Patient-Specific Functional Status

Patients will be assigned to the  
Equipment-based Group (n=43)

Pain, Disability, Kinesiophobia,  
Global Impression of Recovery and  
Patient-Specific Functional Status

Pain, Disability, Kinesiophobia,  
Global Impression of Recovery and  
Patient-Specific Functional Status
